# Supplementary material
Source: Springer Nature journal article supplement (https://hal.science/hal-01290561v1/file/13567_2013_368_MOESM1_ESM.pdf)

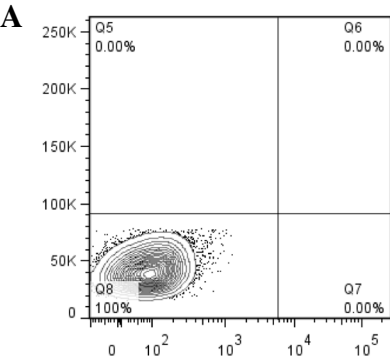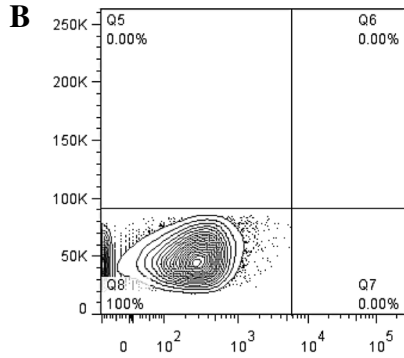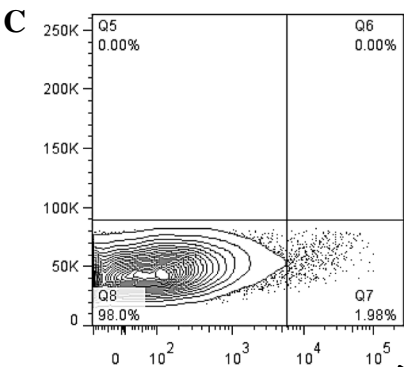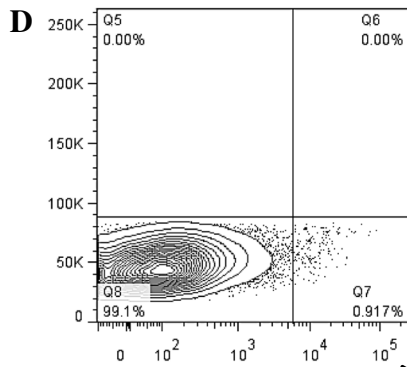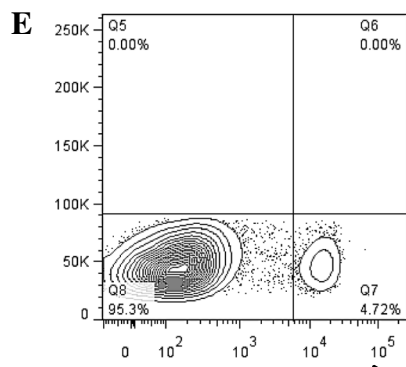

Tetramer (PE) +

Tetramer (PE) +

Tetramer (PE) +

Supplement: MOESM1 [file 13567_2013_368_MOESM1_ESM.pdf]
